# Supplementary material for: “The Ambivalence of Bringing Sex and Travel into Play”- Experiences and Perspectives of Travellers and Healthcare Professionals on Integrated Sexual Health Pre-travel Counselling in the Era of PrEP
Source: Research Square preprint supplement (doi:10.21203/rs.3.rs-7409711/v1), 2025-09-30
Supplement: Supplementary file 1 [file f306682b35524fd6783da811.docx]

Interview-guide

| **Information on general travel habits** | |
| --- | --- |
| **Questions** | **Possible topics to expand on** |
| Would you like to share where you have been travelling to during the last five years and what modes of transportations you used? | Destination and type of travel (warm up and context for interviewer) |
| For which of these travels did you frequent the travel clinic / seek a travel medical consultation?  What was your reasoning behind the decision to use this service? | What was your experience like with the medical consultation?  Why did you choose to search medical advise? |
| Did you experience any health issues after your travels? How did you deal with them?  What would you have needed?  What would have been helpful? | How did you feel? |
| **Sexuality whilst travelling** | |
| Did you think of how to handle your sexual risk before or during your travels? Just tell me what pops into your mind and what you feel comfortable sharing with me. | If little is forthcoming  When we talk about sexual risks, we think of sexually transmitted diseases such as HIV, Gonorrhoea (clap) or Syphilis  Or sexual harassment/ violence |
| Not concerning travelling: Where do you get information on sexual risk taking and how to avoid these risks? | Where do you access your information? Where do you go to for more detailed information?  What would be helpful? What kind of information or resources do you feel are missing? |
| Were there any situations in which you sought information on sexual risks before, during or after a journey?  Yes: What was your experience? Did it have any implications?  No: There are many reasons not to seek information, would you like to share more? |  |
| **Conversation with an expert (part 1)** | |
| Can you remember any instances during which a health professional talked to you about sexuality in a general context not specifically relating to travel?  If yes, how was that experience for you? What did you feel? |  |
| How would you feel if your sexuality came up during a travel medical consultation because the health care provider does not know how relevant the topic is to you. This might be important as often people do not know if it is relevant to them. |  |
| What would you want from such a consultation? How should it be carried out? |  |
| **Conversation with an expert (part 2) new** | |
| Now we proceed to the second part of our conversation. I will be presenting a few of our ideas on how to incorporate sexual health in travel medical consultations. What do you think of them, do you have any comments, inputs? | |
| Each customer of the travel clinic receives a questionnaire to be filled in while waiting before the consultation. The questionnaire includes questions about the customer, their health and their planned journey.  New questions included in the questionnaire could be:  Sexual health is important while travelling. It can be positively influence by vaccinations, medication and behavioural measures. By answering the following questions, you help us to better fit the consultation to your needs:  Please, assess the probability of you having sexual contact during your travel with somebody who is not your permanent partner.  Please tick the best fitting answer:  □ I am quite certain that I will not have any sexual contacts (except with my permanent partner). □ I cannot rule it out and am open to the possibility.  □ I am planning to have sexual contacts or I am hoping for a romantic relationship.  □ I do not want sexual health to be addressed during my consultation. | (Participants receive the questions also in written form)  Please, take your time. Feel free to reread the question and share your opinion. |
| All customers of the travel clinic receive a lot of information on health risks and vaccinations.  While discussing hepatitis B, which can also be sexually transmitted, the health care provider states the following:  “There are currently no vaccinations for other sexually transmitted diseases. In case you are having sex with a person, you can protect yourself by using a condom. The condom provides good protection against HIV. However, it is not necessarily a reliable protective measure against other sexually transmitted diseases. If symptoms such as itching, rash and painful urination occur, please get yourself tested for sexually transmitted diseases as soon as possible.” | Please, share your opinion. |
| When addressing sexual health during a travel medical consultation, various topics can be discussed. I will share a few examples. What is your spontaneous reaction?   - A conversation on how sexuality can be lived more spontaneous and less fearful whilst being as well protected as possible. - Tipps on STI testing and treatment possibilities abroad, how to best deal with the financial aspects, as well as where one can get these services upon returning. - Strategies on how to minimize the risk of harassment and sexual violence, as well as on how to react in difficult situations and how to get help. | Please, share your opinion. |
| Apart from condoms, there is a medication which protects against HIV. For this pre-exposure prophylaxis (PrEP), one is required to take medication according to a specific medication regimen before having sex. Following such a regimen protects against an HIV infection. It might be possible and helpful to follow such a regimen during your travels if you meet certain criteria. You could thus protect yourself against an HIV infection without having to additionally rely on your partner. You can take PrEP in addition to using a condom or without condom use. | Were you aware of this possibility?  Please, share your opinion. |
| **Wrap up** |  |
| This concludes our interview from my side. Do you have any additional questions for me or would like to share something with me we have not touched upon?  Thank you very much for your participation and for openly discussing the subject with me. |  |
